# Supplementary material for: Curcumin loaded on pullulan acetate nanoparticles protects the liver from damage induced by DEN
Source: Royal Society of Chemistry journal article supplement (doi:10.1039/c5ra18989f), 2016-01-01
Supplement: c5ra18989f1.pdf [file c5ra18989f1.pdf]

## **Supporting information**

### **Figure captions**

Fig. s1 (a) FTIR spectra of pullulan (b) PA (c) PAC

Fig. s2 (a) NMR spectra of PA (b) PAC

Table s1. Formulation of curcumin loaded pullulan acetate nanoparticles

Table s2. Loading efficiency of curcumin in PA

Fig. s1

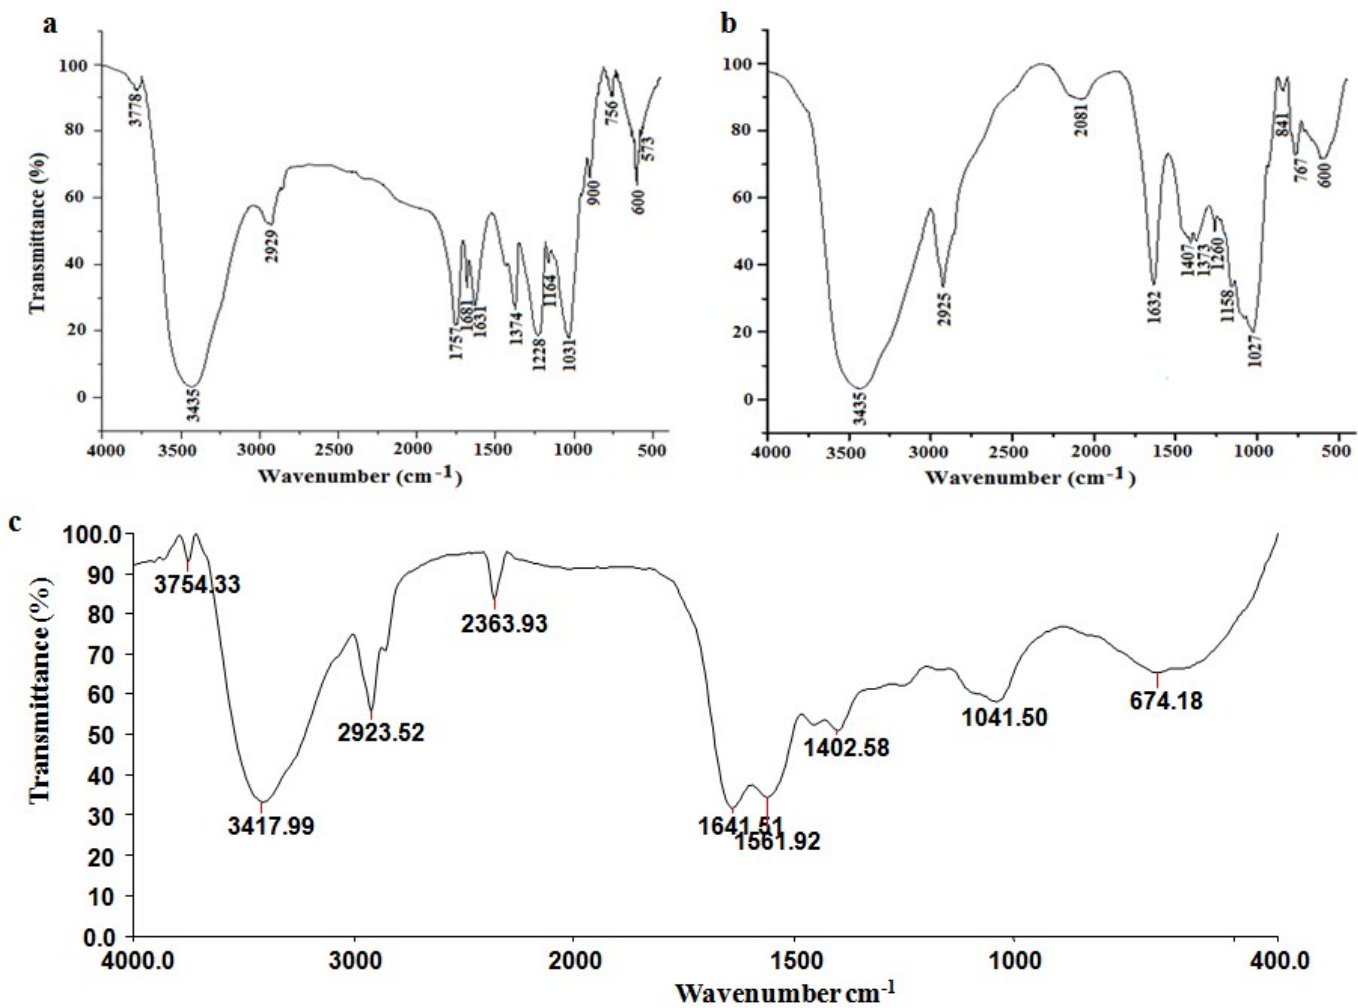

Fig. s2

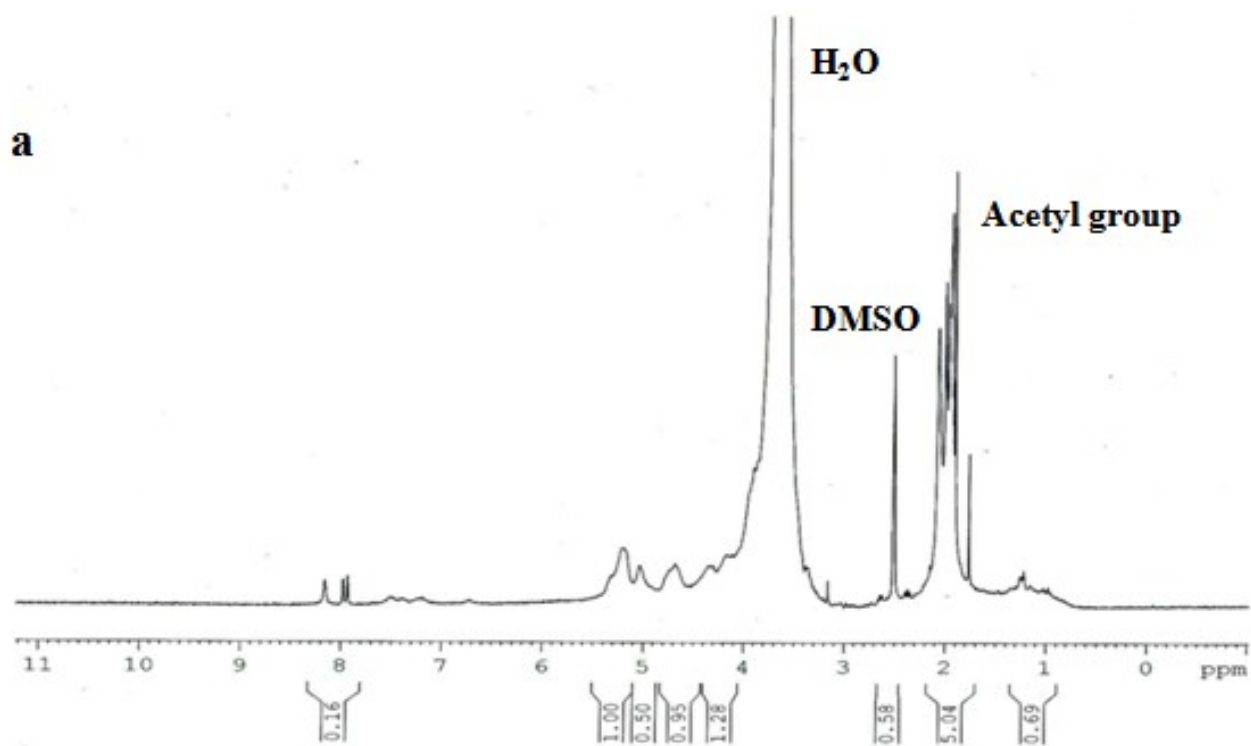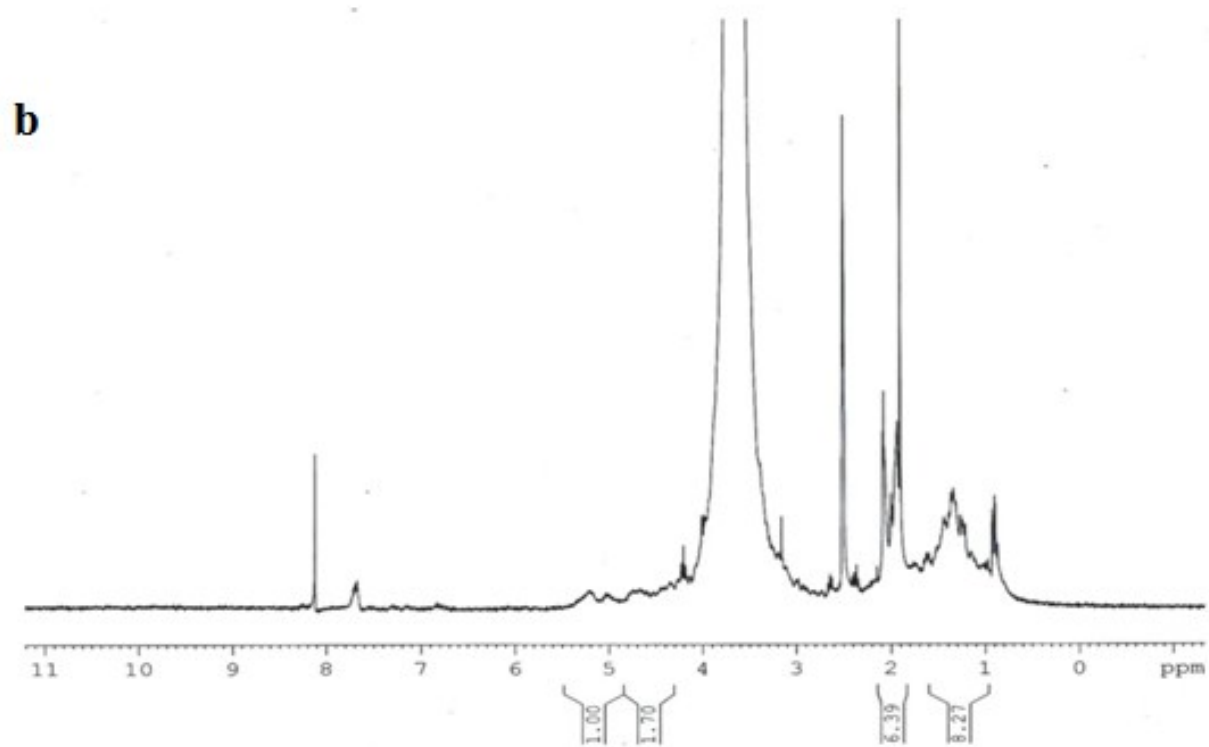

**Table s1.** Formulation of curcumin loaded pullulan acetate nanoparticles

| Ingredients            | Formulation code |         |         |         |         |            |           |
|------------------------|------------------|---------|---------|---------|---------|------------|-----------|
|                        | F-1              | F-2     | F-3     | F-4     | F-5     | F-6        | F-7       |
| Curcumin (mg)          | 5                | 5       | 5       | 5       | 5       | 5          | 5         |
| Pullulan acetate (mg)  | 10               | 20      | 30      | 30      | 30      | 30         | 30        |
| Polyvinyl alcohol (mL) | 20 (1%)          | 20 (1%) | 20 (1%) | 40 (1%) | 60 (1%) | 60 (0.75%) | 60 (0.5%) |
| Acetone (mL)           | 10               | 10      | 10      | 10      | 10      | 10         | 10        |

**Table s2.** Loading efficiency of curcumin in PA

| Formulations | % of curcumin loading |
|--------------|-----------------------|
| F-1          | 22.72 ± 1.02          |
| F-2          | 26.46 ± 1.05          |
| F-3          | 29.51 ± 1.07          |
| F-4          | 47.69 ± 1.08          |
| F-5          | 85.87 ± 1.09          |
| F-6          | 50.39 ± 1.0           |
| F-7          | 45.12 ± 1.02          |
